# Supplementary material for: Characterization and validation of Entamoeba histolytica pantothenate kinase as a novel anti-amebic drug target
Source: PubMed Central journal article supplement (PMC6114107; doi:10.1016/j.ijpddr.2018.02.004), 2018-03-01

**Fig. S1**

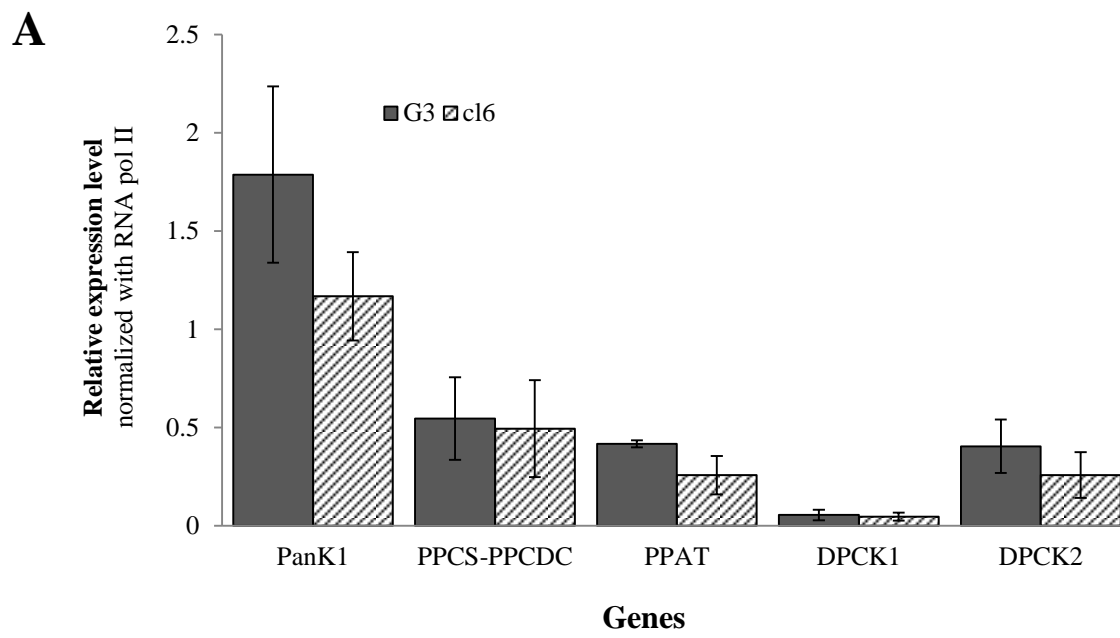

**B**

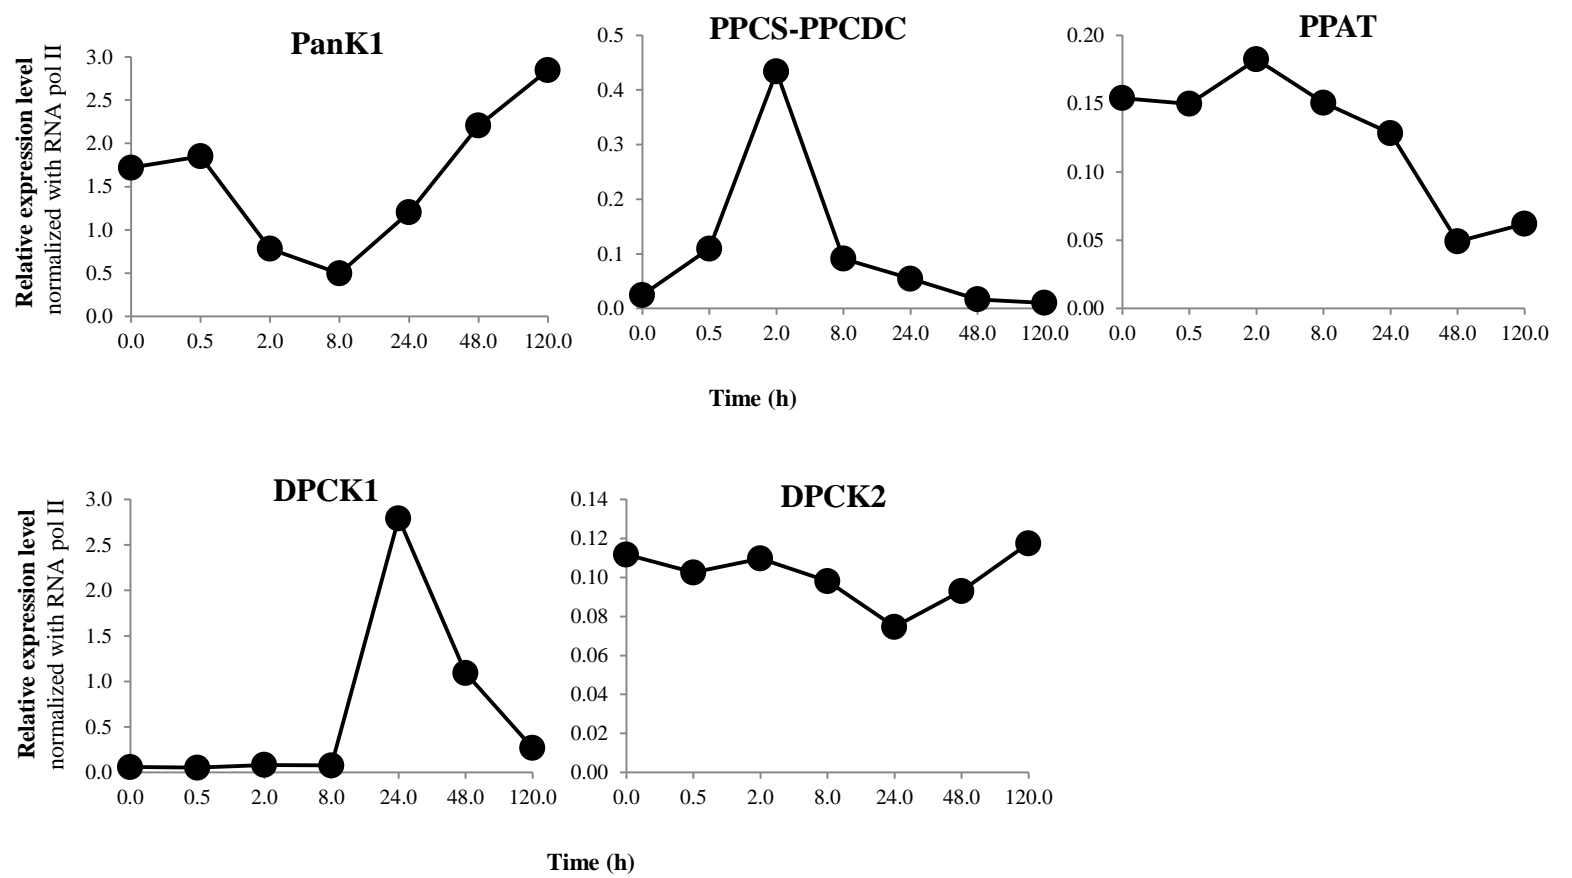

**Fig. S3**

|                         |                                                               |     |
|-------------------------|---------------------------------------------------------------|-----|
| <i>E.histolytica</i>    | -----MSQPSHSIPSKHSVLSNEDIE-HDDHITH                            | 28  |
| <i>E.nuttali</i>        | -----MSQPSHSIPSKHDLVFNEDIE-HDDHITH                            | 28  |
| <i>H.sapiens</i> PanK4  | -----MSWPGTFKMAEC--G----AS-GSGS-----SG                        | 21  |
| <i>H.sapiens</i> PanK3  | -----                                                         | 0   |
| <i>A.thaliana</i> PanK2 | MAGQEDEYDPILDNKREAEAKSQVSVAADKNMAPSTSGTPIHRS-GSRPQLDLSKAEIQG  | 59  |
|                         |                                                               |     |
| <i>E.histolytica</i>    | TFEQYEFTKTQSPLPLNGVRRRTAPLSADMCGTMTKIVFWIPGDTDIDLK-YVEPEESV   | 87  |
| <i>E.nuttali</i>        | NFEQYEFTKTQSPLPLNGVRRRTAPLSADICGTMTKIVFWIPGDTDIDLK-YVEPEESV   | 87  |
| <i>H.sapiens</i> PanK4  | --DSLDKSITLPPDEIFRNLENAKRFAIDICGSLTKLAYYSTVQHKVAKVRSFDHSGKDT  | 79  |
| <i>H.sapiens</i> PanK3  | -----MKIKDAKPSFPWFGMDICGTLVKLSYFEPIDITAEQEEVESLKSI            | 48  |
| <i>A.thaliana</i> PanK2 | NLEERDPTILL-----PNQSDDISHLALDICGSLIKLLYFSRHEDYSNDDDKRKRT--IK  | 112 |
|                         | * * * *                                                       |     |
|                         |                                                               |     |
| <i>E.histolytica</i>    | -----MSGFDLYPD--PVLKVTMNSKGENELCFMKFPTSQIPEFIHYAKTSKLKEI-     | 136 |
| <i>E.nuttali</i>        | -----MSGFDLYPD--PVLKVTMNSKGENELCFMKFPTLQIPEFIHYAKTSKLKEI-     | 136 |
| <i>H.sapiens</i> PanK4  | -----EREHEPP--YEISVQ--EETARLHFIFKENTYIEACLDLFKDHVN---         | 122 |
| <i>H.sapiens</i> PanK3  | RKYLTSNVAYGSTGIRDVHLELKDLTFLGRRGNLHFIRFPTQDLPTFIQMRDKNF----   | 104 |
| <i>A.thaliana</i> PanK2 | -----ERLGITN--GNLRSY-PVLGGRLHFVKFETHKINECLDFIHSKQLHRRDP       | 159 |
|                         |                                                               |     |
| <i>E.histolytica</i>    | -YG-----IGNLQILNVTGGGAYKFANLLKDEMDLEVRQQDEMRCVLVGVNLLLCC--    | 187 |
| <i>E.nuttali</i>        | -YG-----IGNLQILNVTGGGAYKFANLLKDEMDLEVRQQDEMRCVLVGVNLLLCC--    | 187 |
| <i>H.sapiens</i> PanK4  | -----TETKVIQATGGGAYKFKDLIEEKLRLKVDKEDVMTCLIKGCNFVLKNI--       | 170 |
| <i>H.sapiens</i> PanK3  | -----STLQTVLCATGGGAYKFEKDFRTIGNLHLHLKLELDCLVKGLLYIDSVSFN      | 155 |
| <i>A.thaliana</i> PanK2 | PYPWSSKTLPLGTGVIKVTGGGAFKFDLKERLGVSIKEKEDEMHCLVSGANFLLKAI--   | 217 |
|                         | ***** ** * *** *                                              |     |
|                         |                                                               |     |
| <i>E.histolytica</i>    | QEKLCFRFVNKTKL-----YREVTPEIFPYLLVNVGSGVSIKLVTAPEKYERVSGSLIGG  | 242 |
| <i>E.nuttali</i>        | QEKLCFRFVNKTKL-----YREVTPEIFPYLLVNVGSGVSIKLVTAPEKYERVSGSLIGG  | 242 |
| <i>H.sapiens</i> PanK4  | -PHEAFVYQKDS--PEFRFQTNHPHIFPYLLVNVGSGVSIKLVKVEDRFEWVGSSIGG    | 227 |
| <i>H.sapiens</i> PanK3  | GQAECCYFANASEPERCQKMPFNLDPPYLLVNVGSGVSIKLVHVKDNYKRVGTSLGG     | 215 |
| <i>A.thaliana</i> PanK2 | -RHEAFTHMEGEK--EF--VQIDPNLDPYLLVNVGSGVSIKLVKVDGEGKFERVSGTNVGG | 272 |
|                         | ***** ***** * * * *                                           |     |
|                         |                                                               |     |
| <i>E.histolytica</i>    | GTFWGLCCLLTNYKSFDEMLQAAQYQGHQNVLDLYVKDIYGR-CYDSVGLAADMMASSFGK | 301 |
| <i>E.nuttali</i>        | GTFWGLCCLLTNYKSFDEMLQAAQYQGHQNVLDLYVKDIYGR-CYDSVGLAADMMASSFGK | 301 |
| <i>H.sapiens</i> PanK4  | GTFWGLGALLTKTKKFDELLHLASRGQHSNVDMVLRDVYGGAH-QTLGLSGNLIASSFGK  | 286 |
| <i>H.sapiens</i> PanK3  | GTFLGLCSLLTGCESEFALEMASKGDSTQADKLVRDIYGG-DYERFGLPGWAVASSFGN   | 274 |
| <i>A.thaliana</i> PanK2 | GTYWGLGRLLTKCKSFDELLELSQKGDNSAIDMLVGDYIGGMDYSKIGLSASTIASSFGK  | 332 |
|                         | ** ** *** * * * * * * * * * * * * * * * *                     |     |
|                         |                                                               |     |
| <i>E.histolytica</i>    | IQKVPCGEAKNHYSEADIAQGLMMMVCGSIAHLGFELTKLHHINRIFYTCGFVAHNPVW   | 361 |
| <i>E.nuttali</i>        | VQKVPCGEAKNHYSEADIAQGLMMMVCGSIAHLGFELTKLHHINRIFYTCGFVAHNPVW   | 361 |
| <i>H.sapiens</i> PanK4  | SATA--DQ---EFSKEDMAKSLHMI SNDIGQLACLHARLHSLDRVYFGGFFIRGHPVTM  | 341 |
| <i>H.sapiens</i> PanK3  | MIYK--EK-RESVSKEDLARATLVITITNIGSVARMCVNEKINRVVFCNFLRVNTLSM    | 331 |
| <i>A.thaliana</i> PanK2 | AISE--NKELDDYRPEDISLSLLRMISYNIGQISYLNALRFGLKRIFFGGFFIRGHAYTM  | 390 |
|                         | * * * * *                                                     |     |
|                         |                                                               |     |
| <i>E.histolytica</i>    | EAITTMLTTWSSGSVDANFLEYDGYFGSIGALLLSEYEEE--LM-----             | 403 |
| <i>E.nuttali</i>        | EAITTMLTTWSSGSVDANFLEYDGYFGSIGALLLSEYEEE--LM-----             | 403 |
| <i>H.sapiens</i> PanK4  | RTITYSINFFSKGEVQALFLRHEGYLGAIGAFKGAEQDNP-----NQYSWGENYAG      | 393 |
| <i>H.sapiens</i> PanK3  | KLLAYALDYWSKGQLKALFLEHEGYFGAVGALLGLPNFS-----                  | 370 |
| <i>A.thaliana</i> PanK2 | DTISFAVHFWSKQEMQAMFLRHEGFLGALGAFMSYEKHGLDDLMHQQLVERFPMGAPYTG  | 450 |
|                         | * * * * * * * * *                                             |     |

**Fig. S4**

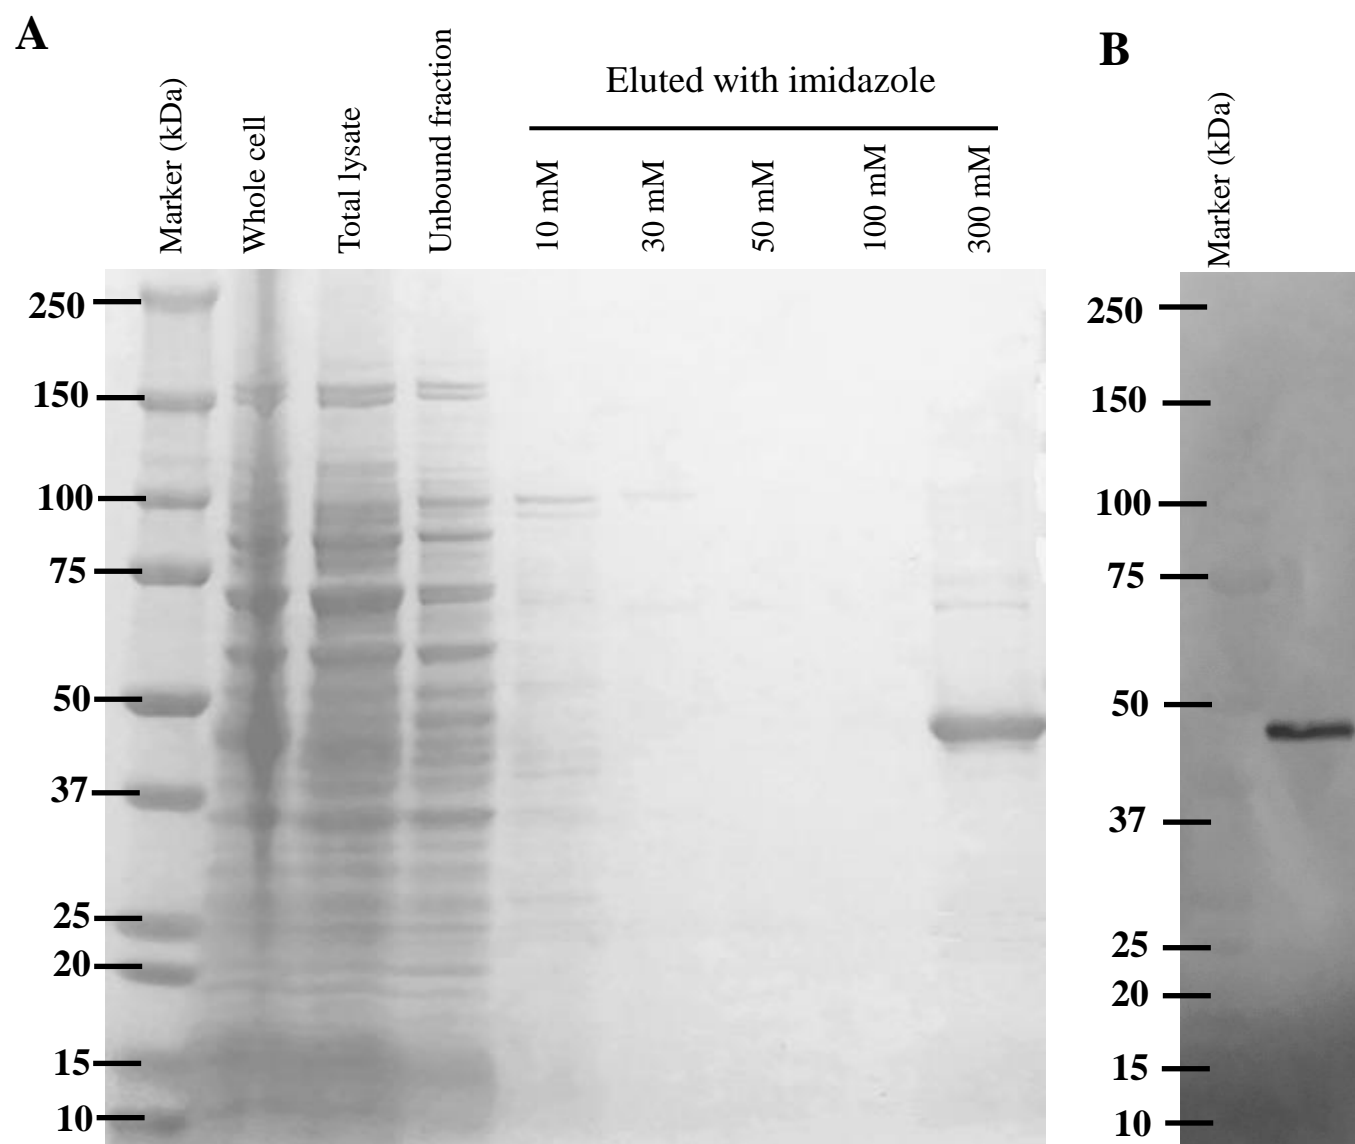

Fig. S5

A

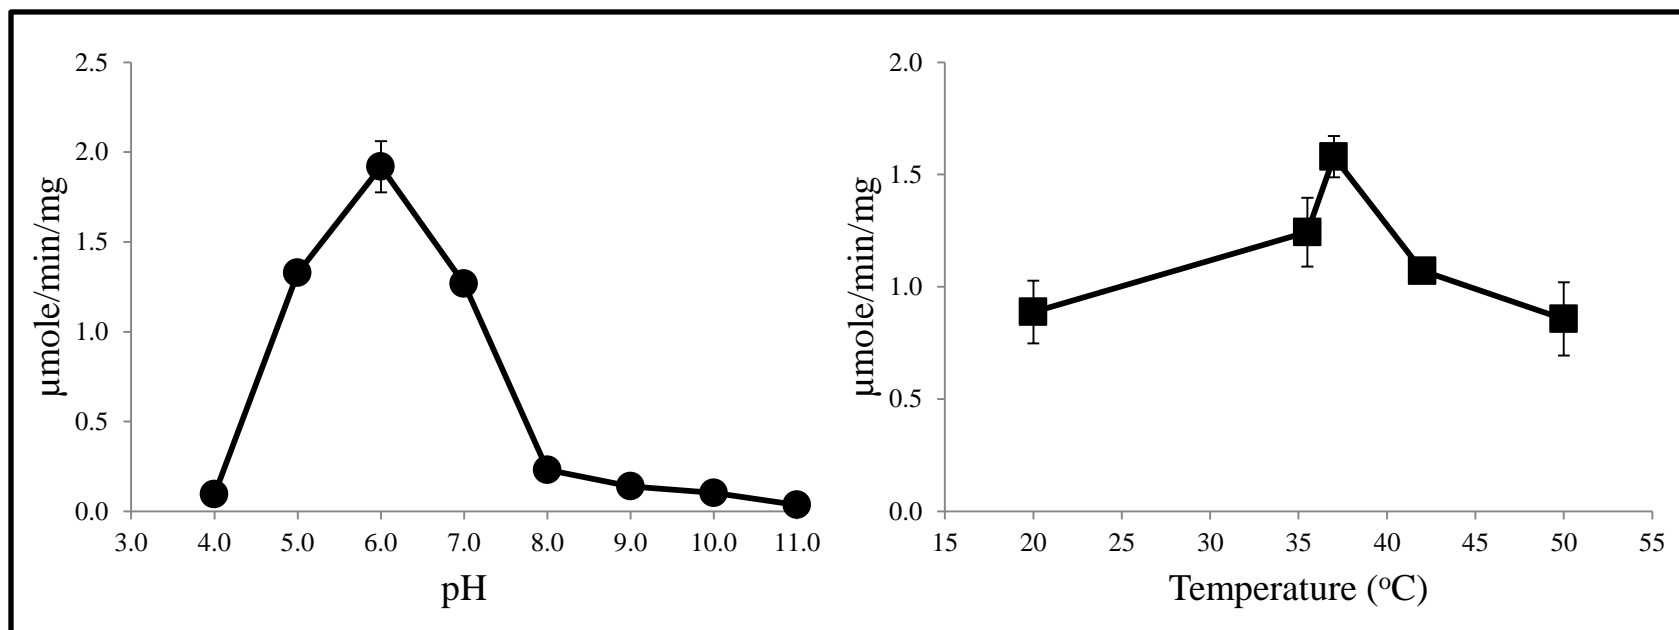

B

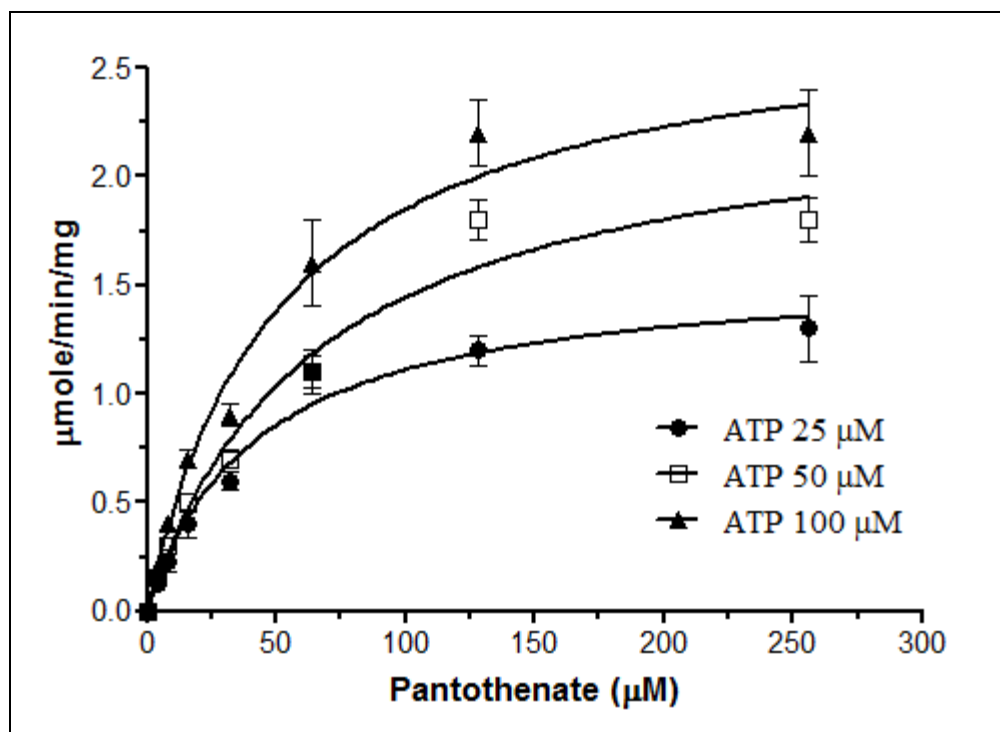

C

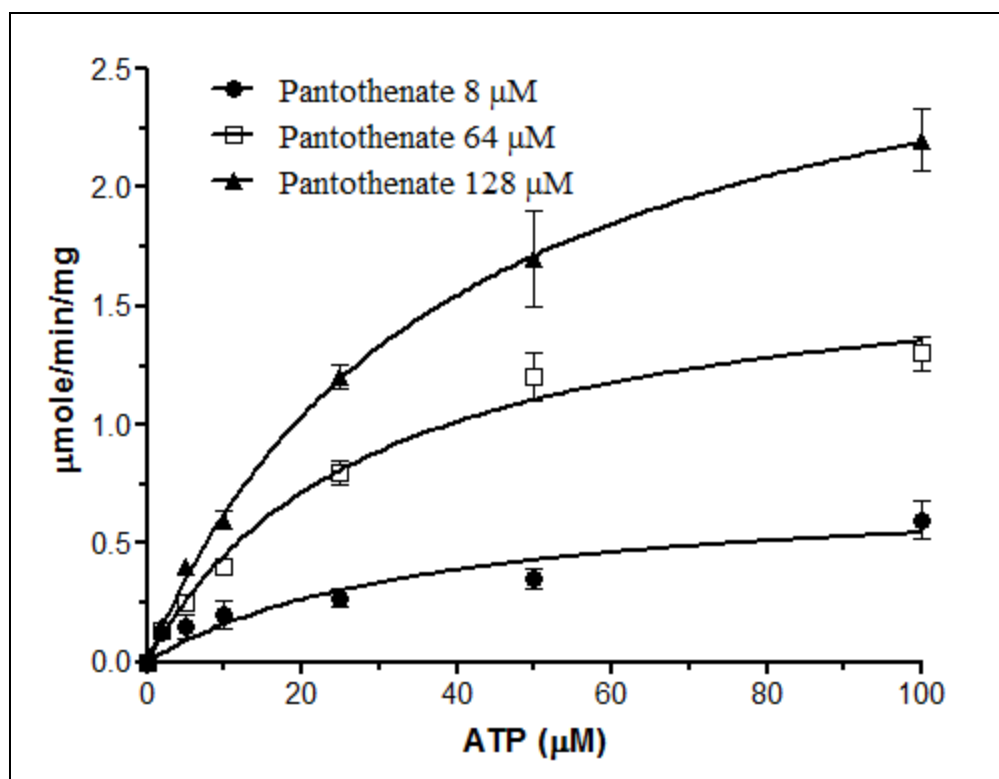

**Fig. S6**

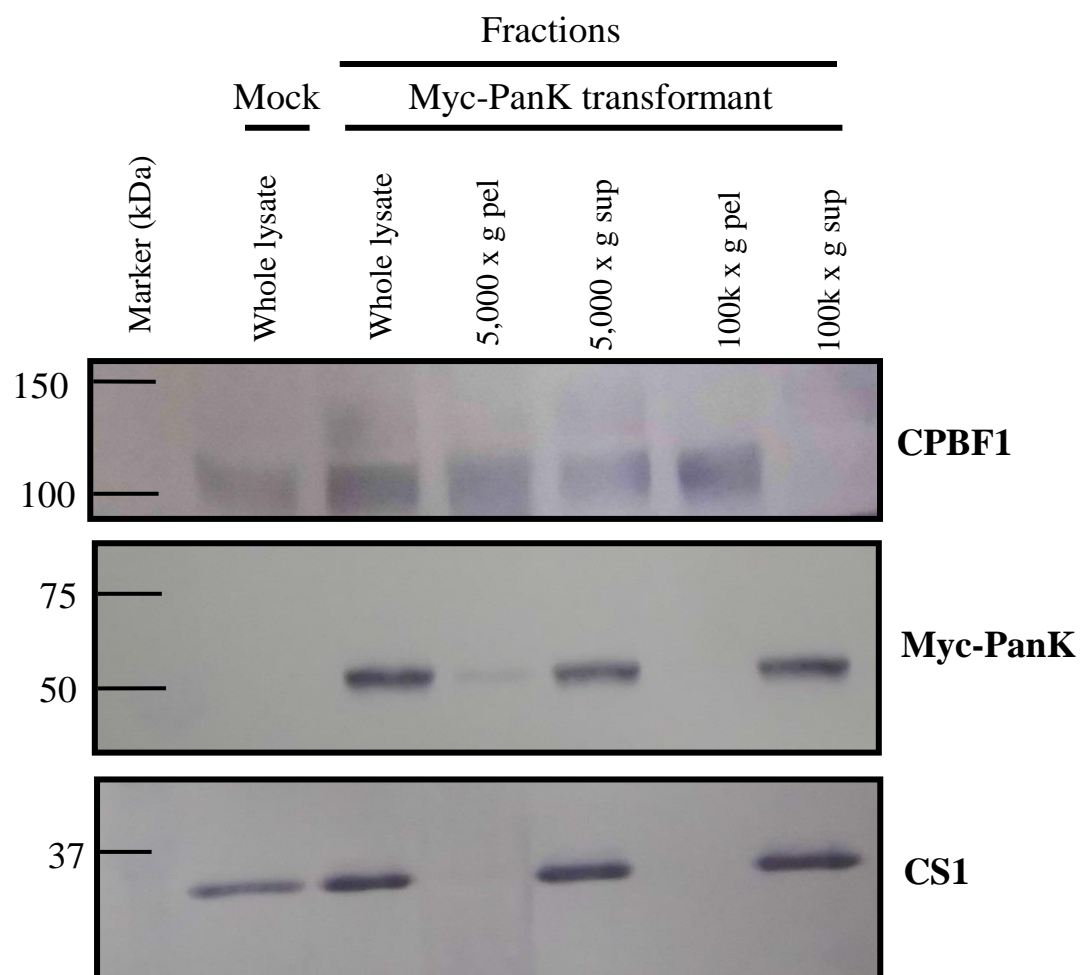

**Fig. S7**

**A**

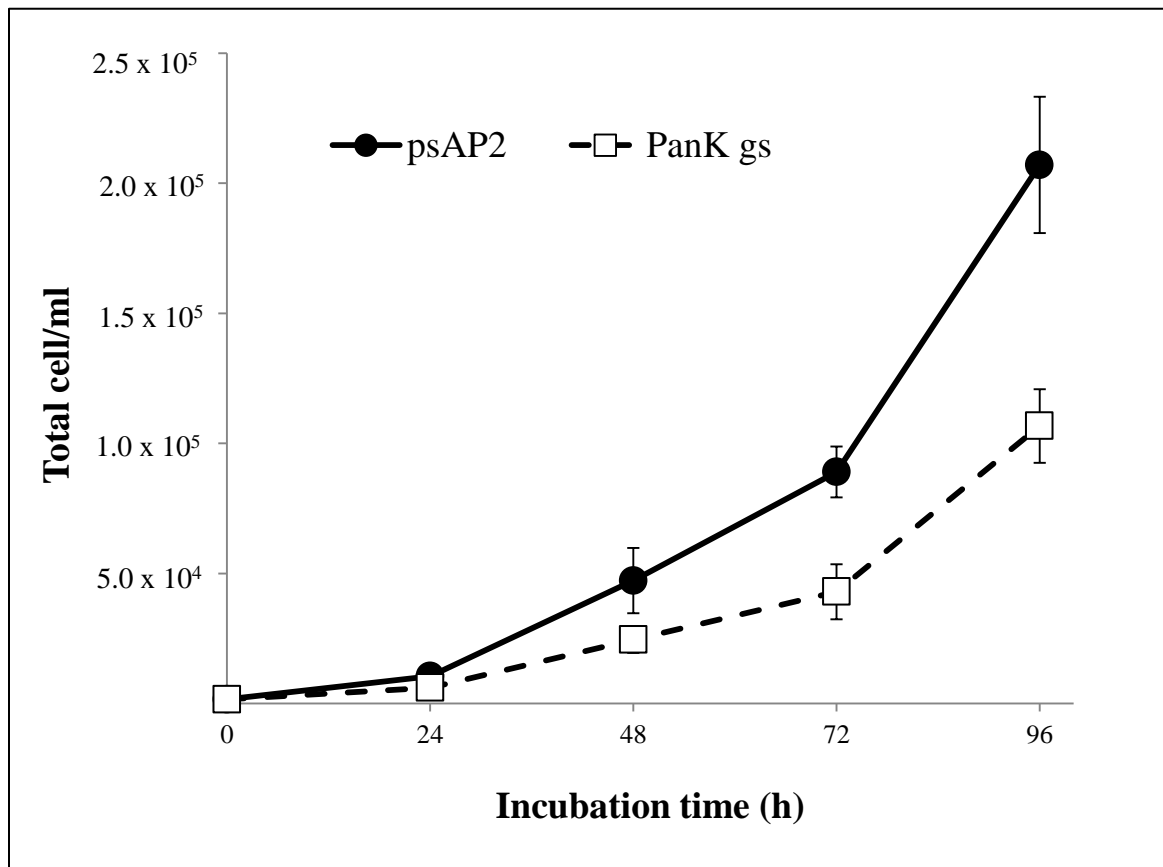

**B**

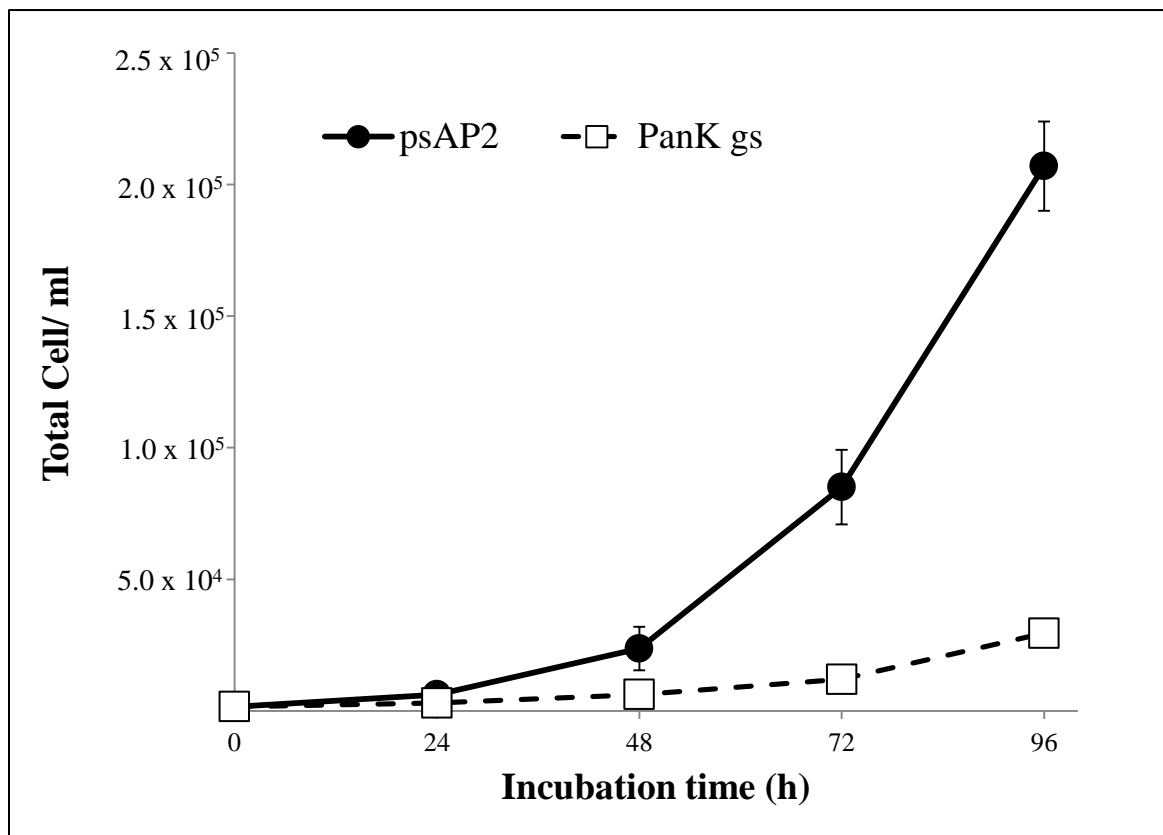

**Fig. S8**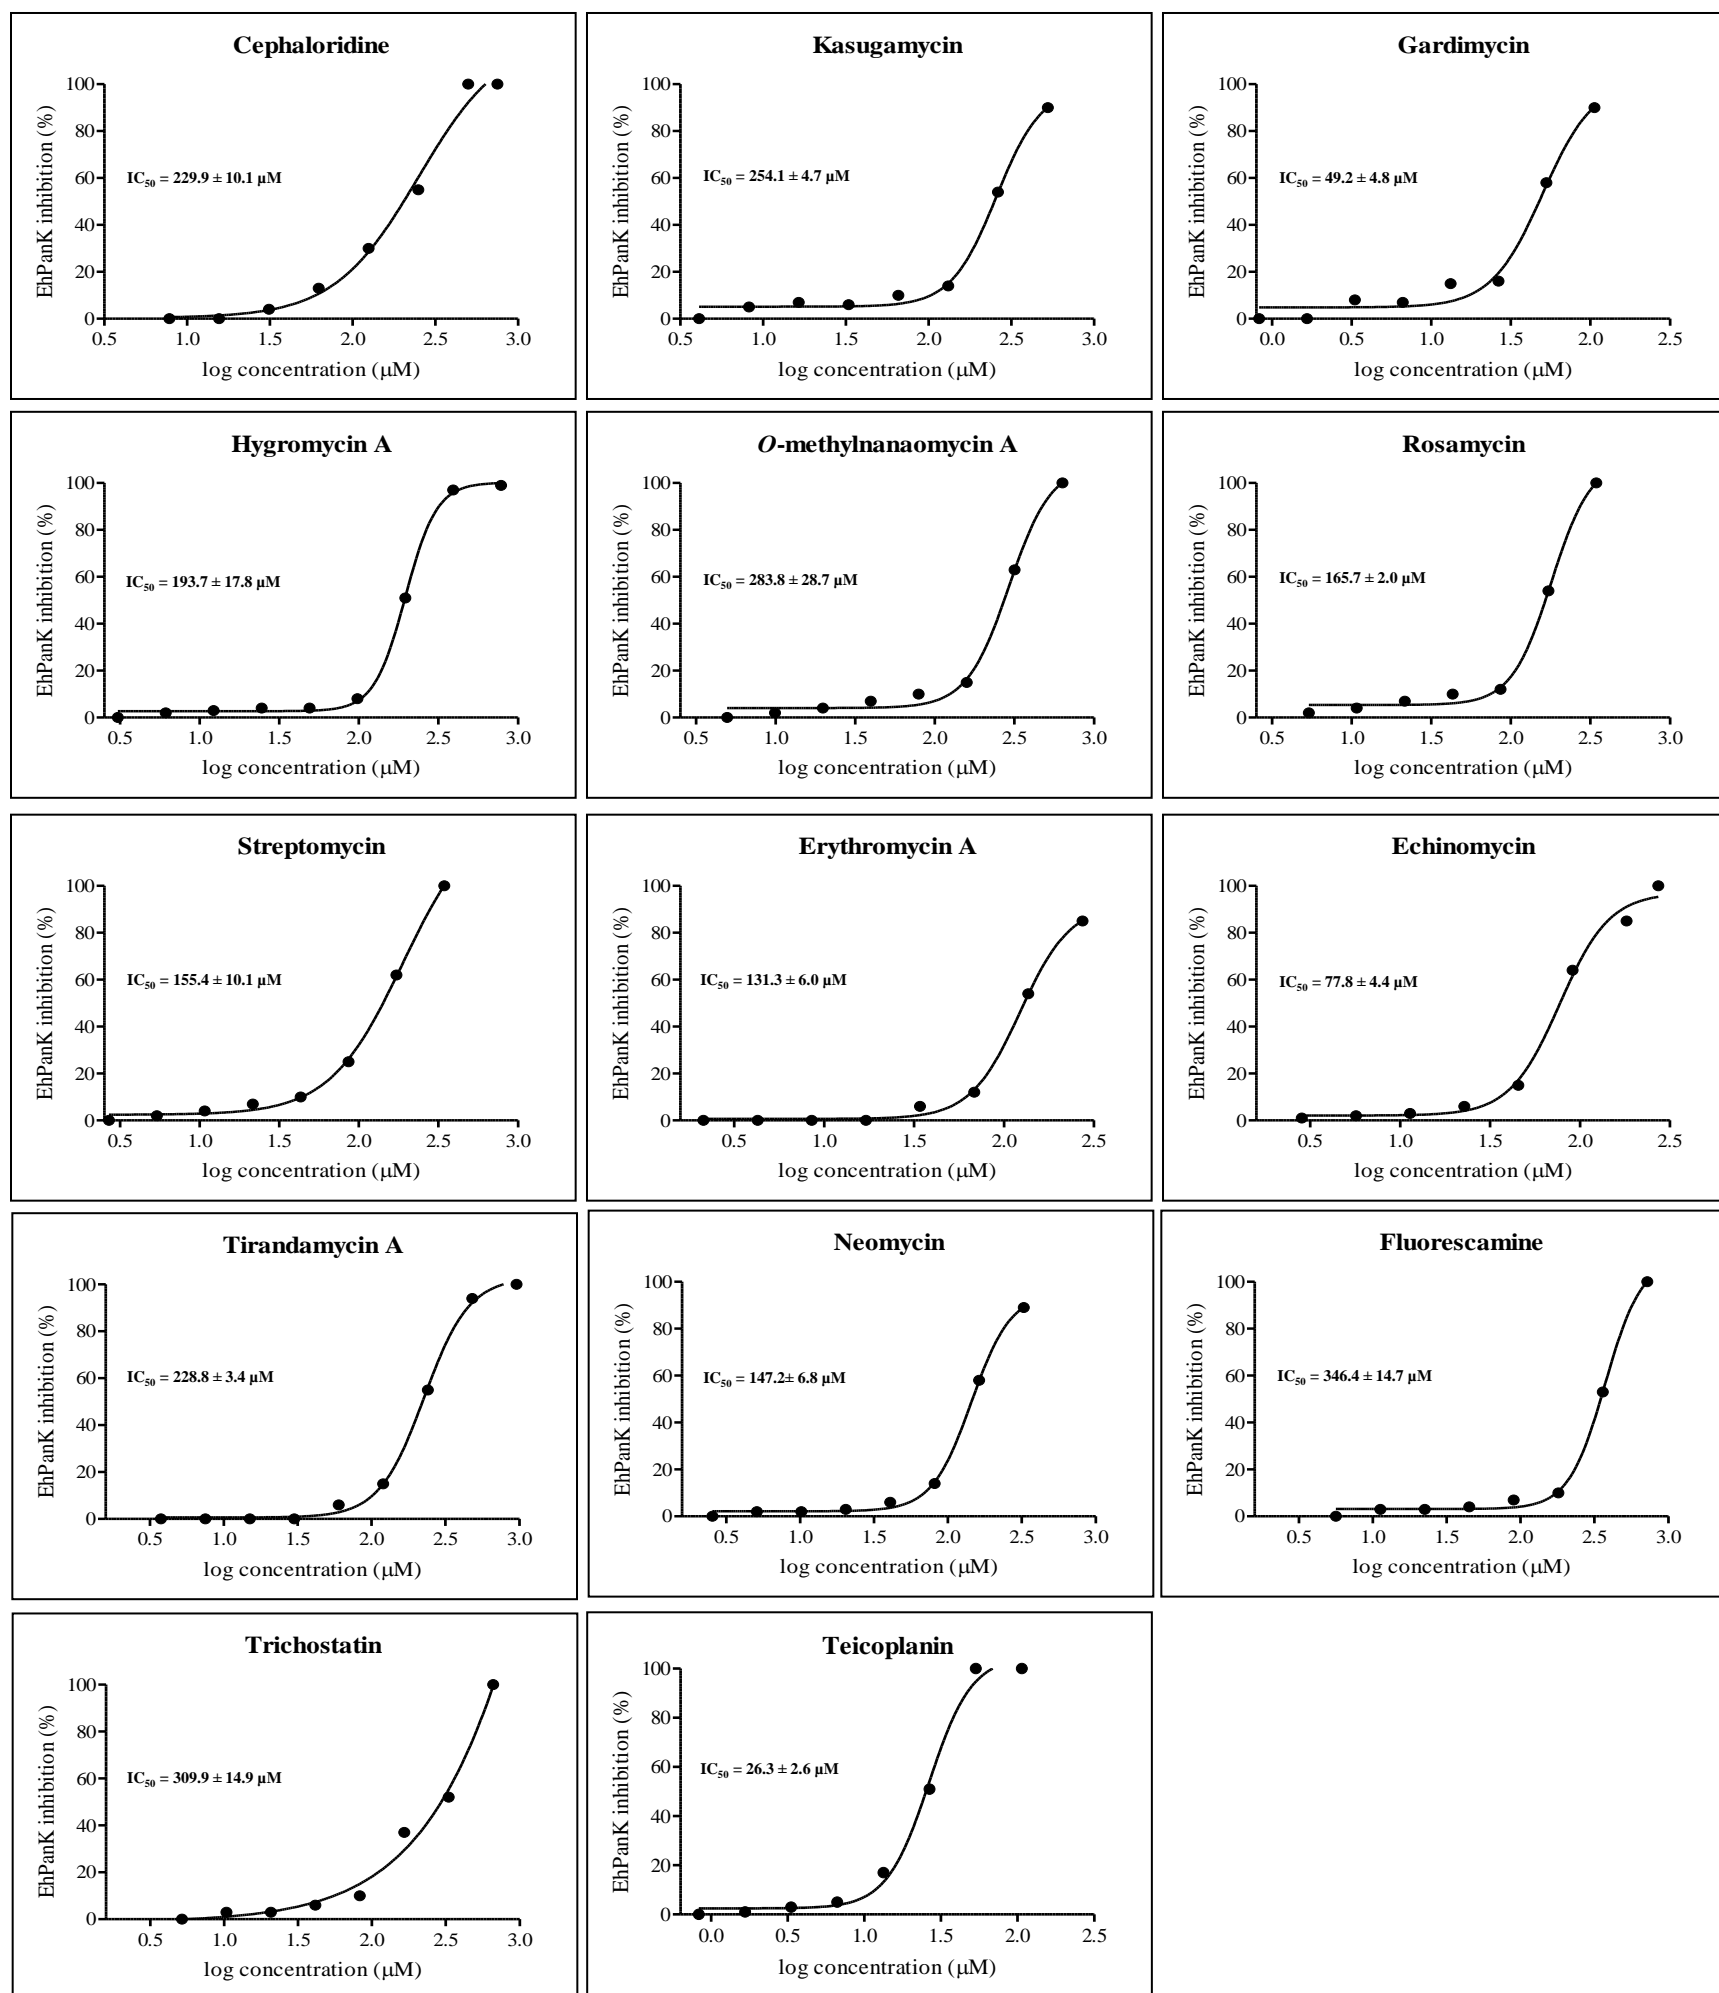

Supplement: mmc1.pdf [file mmc1.pdf]
