# Supplementary material for: Characterization and validation of Entamoeba histolytica pantothenate kinase as a novel anti-amebic drug target
Source: PubMed Central journal article supplement (PMC6114107; doi:10.1016/j.ijpddr.2018.02.004), 2018-03-01

**Fig. S2**

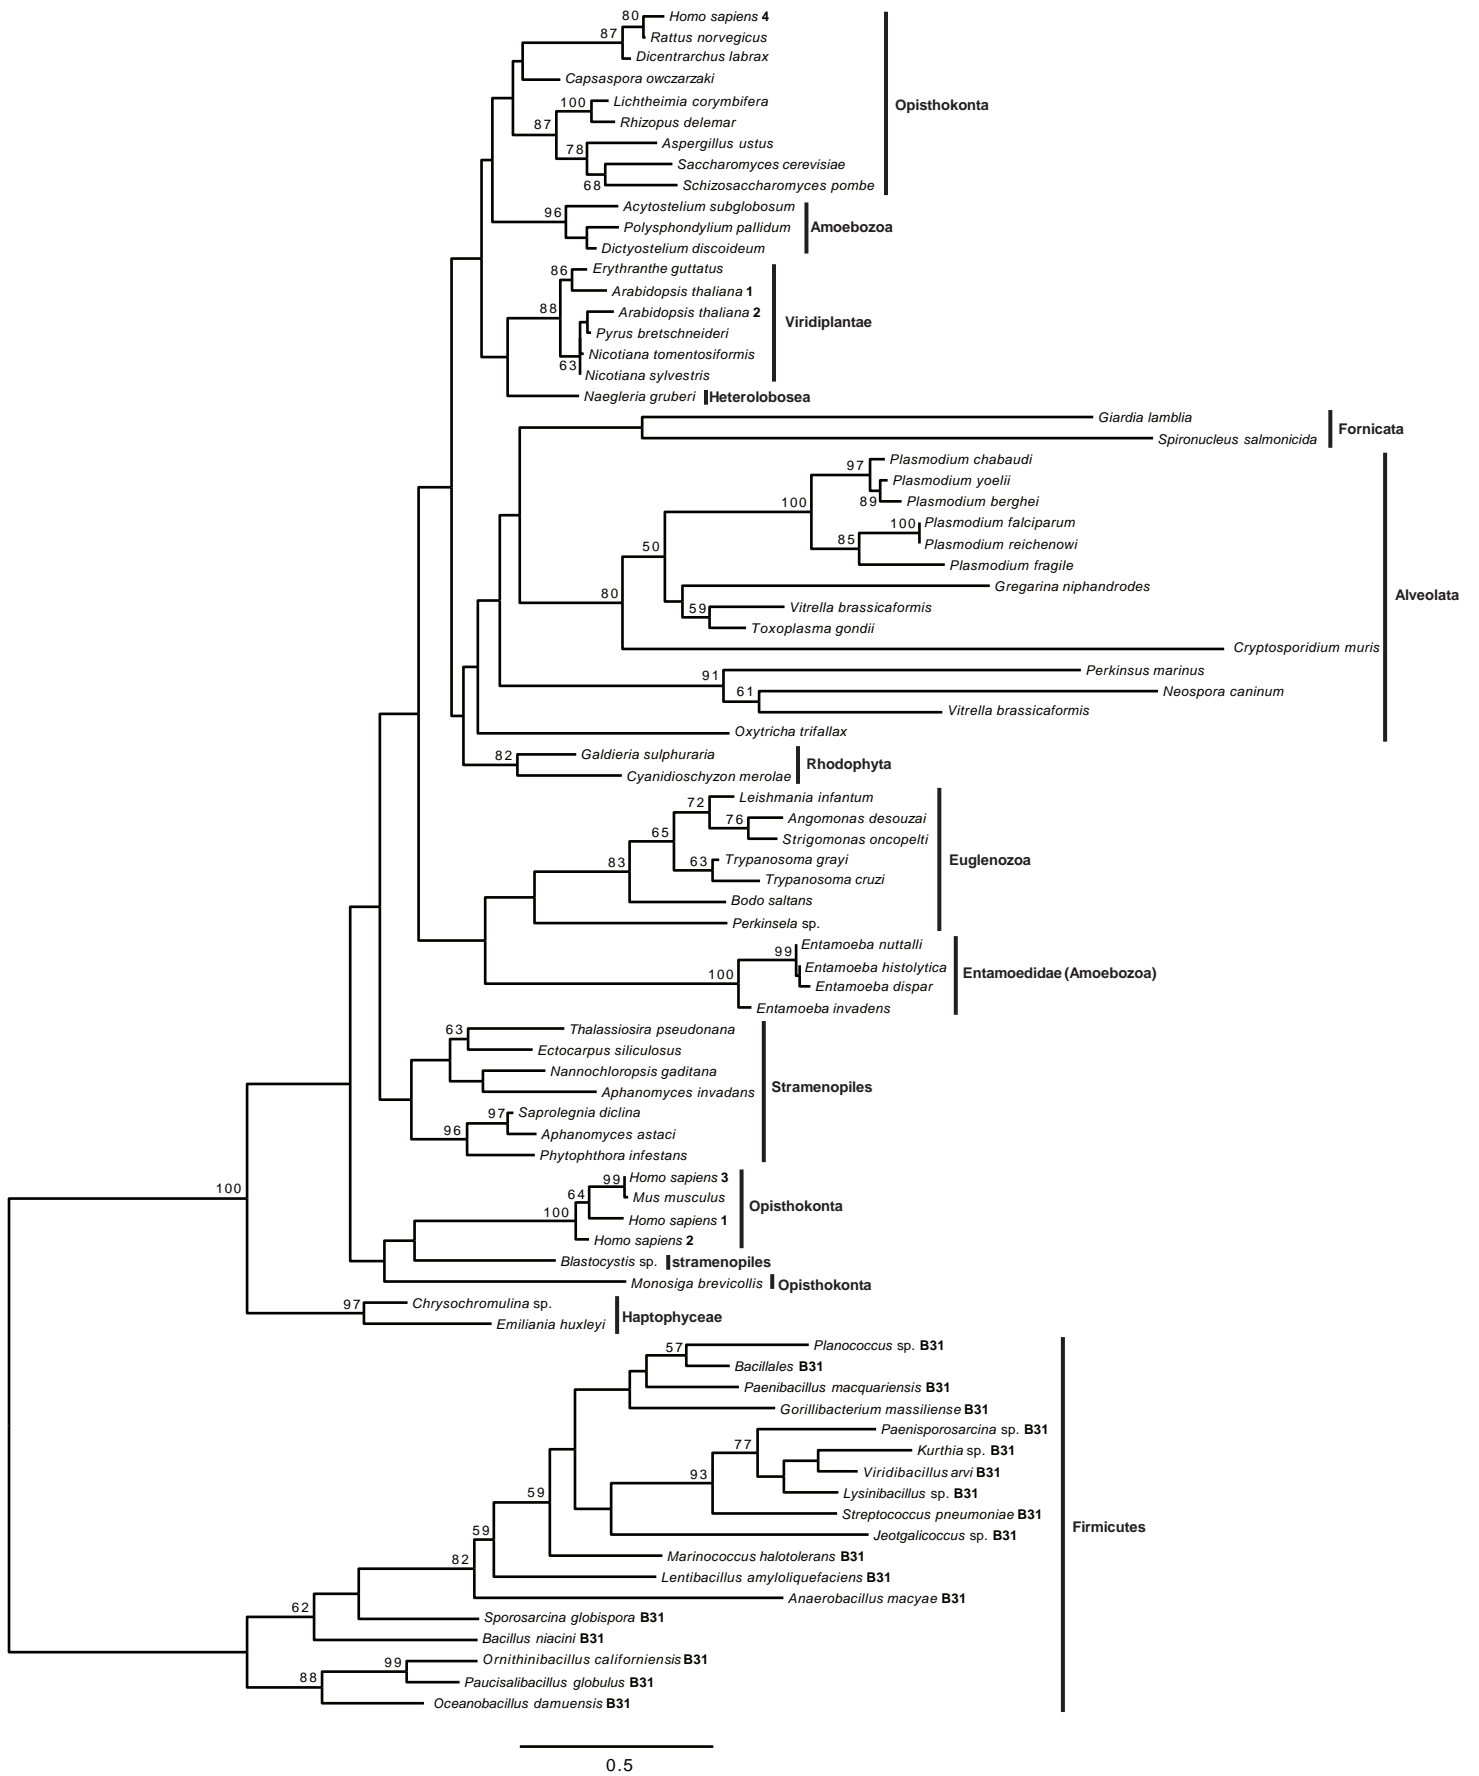

Supplement: mmc2.pdf [file mmc2.pdf]
